# Supplementary material for: Defining the Role of the Pharmacy Technician and Identifying Their Future Role in Medicines Optimisation
Source: PubMed Central journal article supplement (PMC5622352; doi:10.3390/pharmacy5030040), 2017-07-15
Supplement: pharmacy-05-00040-s001.pdf [file pharmacy-05-00040-s001.pdf]

Defining the Role of the Pharmacy Technician and Identifying Their Future Role in Medicines Optimisation

Supplementary Table S1. Complete task table

| Task                                                                                   | Community | Hospital | CCG | GP Practice | Education & Training | Other |
|----------------------------------------------------------------------------------------|-----------|----------|-----|-------------|----------------------|-------|
| <b>Technical</b>                                                                       |           |          |     |             |                      |       |
| Ordering/procurement (including invoice reconciliation & dealing with invoice queries) | y         | y        |     | y           |                      | y     |
| Procurement contract monitoring                                                        |           | y        |     |             |                      |       |
| Updating pharmacy IT systems                                                           | y         | y        | y   | y           | y                    |       |
| Stock management                                                                       | y         | y        |     | y           |                      | y     |
| Ward stock top ups                                                                     |           | y        |     |             |                      |       |
| Fridge management (e.g. temperature monitoring)                                        | y         | y        |     | y           |                      | y     |
| Manage medicines waste                                                                 |           | y        | y   |             |                      |       |
| Order medicines for patients                                                           | y         | y        |     | y           |                      | y     |
| Dispensing                                                                             | y         | y        |     | y           |                      | y     |
| Accuracy Checking of Dispensed Items                                                   | y         | y        |     | y           |                      | y     |
| Handing out medicines                                                                  | y         | y        |     | y           |                      | y     |
| Maintain ACPT competencies in dispensary                                               | y         | y        |     | y           |                      |       |
| Dispensing adherence aids                                                              | y         | y        |     | y           |                      |       |
| Prescription administration (collection & filing, repeat supply)                       | y         | y        | y   | y           |                      |       |
| Communication (MDT)                                                                    | y         | y        | y   | y           | y                    | y     |
| General Communication (patients)                                                       | y         | y        | y   | y           |                      | y     |
| Dispensing controlled drugs                                                            |           | y        |     | y           |                      |       |
| Maintain legal registers                                                               | y         | y        | y   |             |                      |       |
| Selling OTC                                                                            | y         | y        |     |             |                      |       |
| Problem solving                                                                        | y         | y        | y   | y           |                      | y     |
| Processing prescriptions for payment                                                   | y         |          |     | y           |                      |       |
| Eye clinic discharge prescriptions                                                     |           | y        |     |             |                      |       |
| Clinical check of meds before faxing to satellite pharmacy (prison)                    |           |          |     |             |                      | y     |
| <b>Medicines Management</b>                                                            |           |          |     |             |                      |       |
| Medicines optimisation (assisting with MURs, drug history taking)                      | y         | y        | y   |             |                      |       |
| Medicines Management (nursing homes)                                                   | y         |          | y   | y           |                      |       |

## Defining the Role of the Pharmacy Technician and Identifying Their Future Role in Medicines Optimisation

|                                                                                                           |   |   |   |   |   |   |
|-----------------------------------------------------------------------------------------------------------|---|---|---|---|---|---|
| Patient home visits liaising with MDT teams including social workers and patient's families               |   |   | y | y |   |   |
| Check allergies and interactions                                                                          |   | y | y | y |   |   |
| Patient counselling (Handing out prescriptions)                                                           |   |   |   |   |   |   |
| Follow up domiciliary visits with GPs                                                                     |   |   | y |   |   |   |
| Issue anticipatory Rxs for end of life care and arrange same day delivery                                 |   |   |   | y |   |   |
| MARS chart management                                                                                     |   |   | Y |   |   |   |
| Compliance reviews in patients home                                                                       |   |   | y |   |   |   |
| Medicines optimisation (checking patients own drugs for use)                                              |   | y | y |   |   |   |
| Medicines optimisation (medicines reconciliation)                                                         |   | y | y | y |   |   |
| Monitoring Clozapine                                                                                      |   | y |   |   |   |   |
| Reconciling and ordering Clozapine for inpatients                                                         |   | y |   |   |   |   |
| Complete medicines Reconciliation at off site rehab units for new admissions                              |   | y |   |   |   |   |
| Visit community mental health team & provide support for safe and secure audits, FP10s                    |   | y |   |   |   |   |
| Provide support to Clozapine & depot clinics: changes to doses and supplies                               |   | y |   |   |   |   |
| Training on Antibiotics and infection control (MDT)                                                       |   | y |   |   | y |   |
| Problem solving transfer of care of patients                                                              |   | y | y |   |   |   |
| Warfarin counselling and training for staff                                                               |   | y | y |   |   |   |
| Generate supply of meds for individual patients                                                           | y | y | y | y |   | y |
| Prescribing advice                                                                                        |   | y | y | y |   | y |
| Attend MMT and MDT meetings                                                                               |   | y |   |   |   | y |
| Assist nurses with medicines administration (mental health)                                               |   | y |   |   |   |   |
| Discharge planning                                                                                        |   | y |   |   |   | y |
| Demonstrate use of appliance aids e.g. inhaler training                                                   |   | y | y |   |   |   |
| Examples of clinical specialities (anticoagulant clinics, antimicrobial stewardship, renal/dialysis unit) |   | y | y | y |   |   |
| Pastoral support with patients                                                                            | y | y | y | y |   | y |
| Prepare discharge summary                                                                                 |   | y |   |   |   |   |
| Undertake financial transactions                                                                          | y | y |   | y |   |   |
| Check MHRA Alerts                                                                                         | y |   |   |   |   |   |

## Defining the Role of the Pharmacy Technician and Identifying Their Future Role in Medicines Optimisation

|                                                                                                                    |   |   |   |   |   |   |
|--------------------------------------------------------------------------------------------------------------------|---|---|---|---|---|---|
| Advising & liaising with Doctors on formulary medications and chart rewrites (prison)                              |   |   |   |   |   | y |
| Order pathology requests                                                                                           |   |   |   | y |   |   |
| Managing warfarin administration by care workers including Point of Care testing for INR                           |   |   | y |   |   |   |
| Return named CDs from ward                                                                                         |   | y |   |   |   |   |
| Paediatric oncology trouble-shooter role                                                                           |   | y |   |   |   |   |
| Liaise between hospital, patients and community pharmacies regarding prescriptions                                 | y | y | y | y |   |   |
| Provide MI to a range of healthcare professionals including GPs                                                    |   | y |   |   |   |   |
| Responding to queries via phone, email, face to face                                                               | y | y | y | y |   |   |
| Provide pharmaceutical technical advice, support and information to care home staff                                |   | y |   |   |   | y |
| Liaising and communicating with MDT and patients, manufacturers                                                    | y | y | y |   | y | y |
| Updating supply issues for end of life medication                                                                  | y |   |   |   |   |   |
| Check endorsing on prescriptions                                                                                   | y | y | y |   |   | y |
| Co-ordinating across sectors for patient pathway (e.g. setting up patients with Hep b with community pharmacies, ) | y | y | y | y | y | y |
| Providing healthy lifestyle advice (Essential services, patient consultations)                                     | y | y | y | y | y |   |
| Enhanced Services(e.g. palliative care service, minor ailments)                                                    |   |   |   |   | y |   |
| Initiation of Audit, for example prescribing for asthma patients                                                   |   | y |   | y |   |   |
| Data collection and management                                                                                     |   | y | y | y |   |   |
| Assisting with audits                                                                                              | y | y | y | y | y |   |
| Training on Antibiotics and infection control (MDT)                                                                |   | y |   |   |   |   |
| Provide lunchtime learning sessions                                                                                | y |   |   |   |   |   |
| Frail and elderly patients referral                                                                                |   | y | y |   |   |   |
| Care home medication order reviews                                                                                 |   | y | y |   |   | y |
| Oncology clinic                                                                                                    |   | y | y |   |   |   |
| Travel advice                                                                                                      |   | y | y |   |   |   |
| <b>Organisational Management</b>                                                                                   |   |   |   |   |   |   |
| Overseeing a service                                                                                               |   | y |   | y |   | y |
| Manage a regional Pharmacy Technician education Unit                                                               |   |   |   |   | y |   |

## Defining the Role of the Pharmacy Technician and Identifying Their Future Role in Medicines Optimisation

|                                                                                                           |   |   |   |   |   |   |
|-----------------------------------------------------------------------------------------------------------|---|---|---|---|---|---|
| Staff management (appraisals, recruitment, return to work)                                                |   | y | y |   |   | y |
| High level HR (e.g. disciplinary)                                                                         |   | y | y | y |   | y |
| Budget control                                                                                            |   | y | y | y |   | y |
| Writing/review policies & procedures inc. SOPS                                                            |   | y | y |   | y |   |
| Strategic planning (e.g. capacity issues, workload planning)                                              |   | y |   |   |   |   |
| Attending organisational meetings e.g. MDT                                                                |   | y | y |   |   |   |
| Attending external meetings                                                                               |   | y | y | y | y |   |
| Chairing meetings                                                                                         |   | y | y |   |   |   |
| Writing business cases                                                                                    |   | y |   |   |   |   |
| Monitoring KPIs (HR)                                                                                      |   | y | y |   |   |   |
| Preparing staff rotas & time sheets                                                                       |   | y |   | y |   |   |
| Accountable officer (CDs)                                                                                 |   |   | y |   |   |   |
| Witness CD destruction by others e.g. nurses                                                              | y | y | y | y | y |   |
| Controlled drugs (dispensing methadone and administration supervision))                                   | y |   |   |   |   |   |
| Report Trust drug spend                                                                                   |   |   | y |   |   |   |
| Controlled drugs Destruction                                                                              | y | y | y | y |   | y |
| Organisational related activities (supply figures to senior team)                                         |   | y | y |   |   | y |
| <b>Training and Development</b>                                                                           |   |   |   |   |   |   |
| Training of care home staff to administer meds                                                            |   |   | y |   |   |   |
| Training and development (in-house training)                                                              | y | y | y | y |   | y |
| Training other healthcare professions (ward based for nurses, OTs Physios)                                | y | y | y |   | y |   |
| Lecturing for the Level 3 Diploma                                                                         |   | y | y |   | y |   |
| Supervise and train pre reg pharms and techs, marking work                                                |   | y | y |   | y |   |
| Undertake Assessment and verification for Level 4 Diploma                                                 |   | y | y |   | y |   |
| Undertake NVQ Assessment                                                                                  | y | y | y |   | y |   |
| Undertake IQA Verification                                                                                |   | y | y |   | y |   |
| Train prescription clerks                                                                                 |   |   | y |   |   |   |
| Teaching/training pre-reg pharmacists/pharmacy technicians/pharmacy assistants in-house: MMS, Level 2 & 3 |   | y | y | y | y | y |
| L2 assistant expert witnessing                                                                            | y | y |   | y |   |   |
| Facilitator for ACPT                                                                                      |   | y |   |   | y |   |
| Training and assessing competency of support workers to administer medication                             |   |   |   |   |   |   |

## Defining the Role of the Pharmacy Technician and Identifying Their Future Role in Medicines Optimisation

|                                                                                                                                   |  |   |   |   |   |   |
|-----------------------------------------------------------------------------------------------------------------------------------|--|---|---|---|---|---|
| Mentoring staff                                                                                                                   |  | y | y |   |   | y |
| Manage the quality assurance of education programmes                                                                              |  | y |   |   | y |   |
| Writing & updating training programmes                                                                                            |  | y | y |   | y |   |
| <b>Clinical Governance</b>                                                                                                        |  |   |   |   |   |   |
| Quality assurance (error investigation and management)                                                                            |  | y | y |   |   |   |
| Compliance to medicines and CD policies                                                                                           |  | y | y |   |   | y |
| Datix/Incident reporting (investigating and reviewing)                                                                            |  |   |   |   |   |   |
| Participate in risk Management work relating to prescribing                                                                       |  | y |   |   |   |   |
| Lead on medicines management clinical governance issue relating to care homes, liaising with CCG Safeguarding Adults Lead and CQC |  |   | y |   |   |   |
| Data analysis and writing reports (prescribing/incidents/usage and wastage and also for medicines management incentive schemes)   |  |   | y |   |   |   |
| <b>Manufacturing &amp; Aseptics</b>                                                                                               |  | y |   |   |   | y |
| Checking of batches                                                                                                               |  | y |   |   |   | y |
| Extemporaneous dispensing                                                                                                         |  | y |   |   |   |   |
| Manufacturing aseptic products                                                                                                    |  | y |   |   |   | y |
| Check Customer service team orders (4 x a day)                                                                                    |  | y |   |   |   |   |
| Calculate costs for chemotherapy prescriptions                                                                                    |  |   |   |   |   |   |
| Health and safety risk assessments                                                                                                |  | y |   |   |   | y |
| Attend daily senior webex meetings                                                                                                |  |   |   |   |   | y |
| Building IT software                                                                                                              |  |   |   |   |   | y |
| <b>Primary Care</b>                                                                                                               |  |   |   |   |   |   |
| Medicines Switches CCG incl letters to patients                                                                                   |  |   | y | y |   | y |
| Monitoring of Care Home with nursing prescribing incentive scheme                                                                 |  |   | y |   |   |   |
| Training carers on medication                                                                                                     |  |   | y |   |   |   |
| Admission avoidance team referrals                                                                                                |  |   | y |   |   |   |
| Media campaigns                                                                                                                   |  |   | y |   |   |   |
| Service Improvement advice                                                                                                        |  |   | y |   |   | y |
| Regional drug contract amendments                                                                                                 |  | y | y |   |   |   |
| Review high cost drug data from acute trusts & identify anomalies                                                                 |  |   | y |   |   |   |
| Advise Care home staff on legal, safe and secure handling of medicines                                                            |  |   | y |   |   |   |
| Admin/audit of Community Pharmacy Local enhanced services                                                                         |  |   | y |   |   |   |

## Defining the Role of the Pharmacy Technician and Identifying Their Future Role in Medicines Optimisation

|                                                                                                              |   |   |   |   |   |   |
|--------------------------------------------------------------------------------------------------------------|---|---|---|---|---|---|
| Coordinate patient and work load                                                                             |   | y |   | y |   |   |
| <b>Other</b>                                                                                                 |   |   |   |   |   |   |
| Academic research                                                                                            |   |   |   |   | y |   |
| Research and clinical trials                                                                                 |   | y |   |   |   |   |
| Project management/ project work                                                                             |   | y | y |   | y | y |
| Visit Community mental health team                                                                           | y |   |   |   |   |   |
| Cleaning                                                                                                     | y | y |   |   |   |   |
| Monthly monitoring forms (company)                                                                           | y |   |   |   |   |   |
| Actioning tasks from lead pharmacist e.g. emergency drug boxes                                               |   | y |   |   |   |   |
| Adios reporting - providing evidence and justifying use of abusable drug usage on wards when usage increases |   |   |   |   |   | y |
| Weekly QT interaction lists for adaction teams (methadone)                                                   | y |   | y |   |   |   |
| Perform user satisfaction survey                                                                             |   | y |   |   |   |   |
| Licensed and unlicensed quality review meetings                                                              |   | y |   |   |   |   |
| Source new item requests                                                                                     |   | y |   |   |   |   |
| Quality improvement work                                                                                     |   | y |   |   |   |   |
| Error investigation                                                                                          |   | y |   |   |   |   |
| Deal with complaints                                                                                         | y | y | y |   |   |   |
| Spot checks on wards                                                                                         |   | y |   |   |   |   |
| Mentoring staff                                                                                              |   | y |   |   |   |   |
| Liaise with nursing staff re medication                                                                      |   | y |   |   |   |   |
| Process high cost medication requests                                                                        |   | y |   |   |   |   |
| Clear out medicines trolleys                                                                                 |   | y |   |   |   |   |
| HIV clinic                                                                                                   |   | y |   |   |   |   |
| Represent department at external meetings                                                                    |   | y | y |   |   |   |
| Visit 4 main hospitals each week                                                                             |   | y |   |   |   |   |
| Haematology clinic                                                                                           |   | y |   |   |   |   |
| Compile fridge data weekly                                                                                   |   | y |   |   |   |   |
| Emergency cupboard supply                                                                                    |   | y |   |   |   |   |
| Checking clozapine bloods                                                                                    |   | y |   |   |   |   |
| Wastage reduction                                                                                            |   | y |   |   |   |   |
| Environmental monitoring                                                                                     |   | y |   |   |   |   |

## Defining the Role of the Pharmacy Technician and Identifying Their Future Role in Medicines Optimisation

|                                                                            |  |   |   |  |  |   |
|----------------------------------------------------------------------------|--|---|---|--|--|---|
| C Diff ward round                                                          |  | y |   |  |  |   |
| Abx training for nurses                                                    |  | y |   |  |  |   |
| Updating microguide app                                                    |  | y |   |  |  |   |
| Formulary work                                                             |  | y |   |  |  |   |
| Maintaining training databases                                             |  | y |   |  |  |   |
| Horizon scanning                                                           |  | y |   |  |  |   |
| Vaccine storage and handling                                               |  | y |   |  |  |   |
| Read health protection bulletins                                           |  |   | y |  |  |   |
| Falls reviews                                                              |  | y | y |  |  |   |
| Authorising staff payments on SSTS trials activities                       |  | y |   |  |  |   |
| Home visits following discharge = adherence                                |  | y |   |  |  |   |
| Answering Freedom of information requests                                  |  |   | y |  |  |   |
| Checking that medication is safe to administer                             |  | y | y |  |  |   |
| Visits to patients at the request of GP practices and hospitals            |  |   | y |  |  |   |
| Train nurses, physios and OTs to check meds against Rx on transfer of care |  | y | y |  |  |   |
| Collect prescribing data                                                   |  |   | y |  |  |   |
| Respond to parliamentary questions                                         |  |   |   |  |  | y |
| Respond to media questions                                                 |  |   |   |  |  | y |
| Represent HSCIC at industry exhibitions                                    |  |   |   |  |  | y |
